# Supplementary material for: Pooled-DNA sequencing identifies genomic regions of selection in Nigerian isolates of Plasmodium falciparum
Source: PubMed Central journal article supplement (PMC5492182; doi:10.1186/s13071-017-2260-z), 2017-06-29

Figure S1

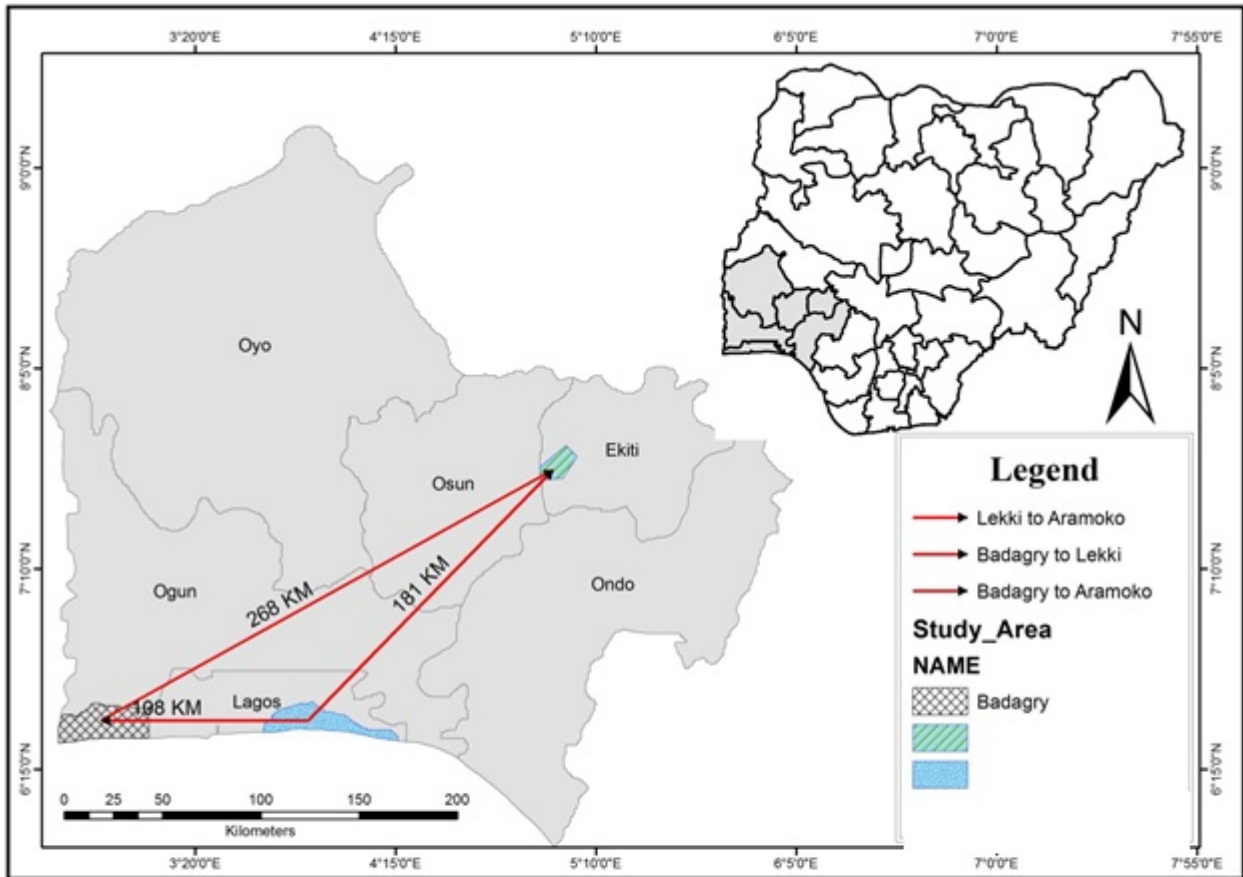

Supplement: 13071_2017_2260_MOESM1_ESM.pdf [file 13071_2017_2260_MOESM1_ESM.pdf]
